# Supplementary material for: Domain swaps of Arabidopsis secondary wall cellulose synthases to elucidate their class specificity
Source: PubMed Central journal article supplement (PMC6508838; doi:10.1002/pld3.61), 2018-07-10
Supplement: PLD3-2-e00061-s001.pdf [file PLD3-2-e00061-s001.pdf]

## Supporting Information

### The Central and C-Terminal Domains of Arabidopsis Secondary Wall Cellulose Synthases Mediate their Class Specificity

Joseph Lee Hill Jr., Ashley Nicole Hill, Alison Roberts, Candace H. Haigler and Ming Tien

**Table S1** – Primers for CESA promoter cloning

|               |                                      |
|---------------|--------------------------------------|
| CesA4ProSacII | <u>ACCGCGGACCC</u> CATACATGTGATGCTA  |
| CesA4ProNotI  | CAGCGGCCGCGGCGAGGTACACTGAGCT         |
| CesA7ProSacII | <u>ACCGCGGGACG</u> AGGCAAGAGTATGTTG  |
| CesA7ProNotI  | <u>ACGCGGCCG</u> CAGGGACGGCCGGAGATTA |

*SacII* and *NotI* sites underlined

**Table S2** – Domain swap primers

| <b>CesA4 + CesA8</b> |                                                                 |
|----------------------|-----------------------------------------------------------------|
| 4-NT-F (4/8)         | CGAGAGCTCAGTGTACCTCGCCGCGGCCGCCATGGAACCAAACACCATGGCCAG          |
| 4-NT-R (4/8)         | TTCGAATCTTGCAGATAACCGGTCAAGGTAGGTTTCTCGGTTAATCGGAAACCA          |
| 4-Central-F (4/8)    | TCCTATTAACCGAGAAACTTACATCGACCGTCTCTCTATGAGATTTGAACGGGAT         |
| 4-Central-R (4/8)    | AGAGGCAAAGAAGTGAATGGGTAGACAATTGTGTTGATGTAAGCAAGACGTTCTAGAA<br>T |
| 4-CT-F (4/8)         | TAGCTTATATAAAACACTATTGTTTTATCCTTTCACTTCTATTCTCTACTTGCCTATT      |
| 4-CT-R (4/8)         | GGATATCACTAGTAAAAGGTACCGAGCTCCTTAACAGTCGACGCCACATTGCCTC         |
| 8-NT-F (4/8)         | CGAGAGCTCAGTGTACCTCGCCGCGGCCGCCATGATGGAGTCTAGGTCTCCCATCTGC<br>A |
| 8-NT-R (4/8)         | AATCTCATAGAGAGACGGTCGATGTAAGTTTCTCGGTTAATAGGAGACCATTTAGG        |
| 8-Central-F (4/8)    | TCCGATTAACCGAGAAACCTACCTTGACCGGTTATCCGCAAGATTTCGAA              |
| 8-Central-R (4/8)    | AGTGAAAGGATAAAACAATAGTGTATATAAGCTAATCTCTGGAGCAACTTGAGG          |
| 8-CT-F (4/8)         | ACGTCTTGCTTACATCAACACAATTGTCTACCCATTCACTTCTTTGCCTCTTGTT         |
| 8-CT-R (4/8)         | TCACTAGTAAAAGGTACCGAGCTCCTTAGCAATCGATCAAAAGACAGTTCAGAGAAAG      |
| <b>CesA4 + CesA7</b> |                                                                 |
| 7-NT-F (4/7)         | CGAGAGCTCAGTGTACCTCGCCGCGGCCGCCATGGAAGCTAGCGCCGGTCTTG           |
| 7-NT-R (4/7)         | TAGAGAGACGGTCAAGGTAGGTCTCACGTTCAATAGGGAACC                      |
| 7-Central-F (4/7)    | GGTTTCCGATTAACCGAGAAACCTATCTAGATCGGCTTTCCC                      |
| 7-Central-R (4/7)    | CCGGAATAGTACAATAGGCAAGAAGTGGTATAGATGTGAAGGG                     |
| 7-CT-F (4/7)         | GTTTATCCTTTCACTTCTATTCTCTACTTGCCTACTGTATCCTTCCAG                |

|                      |                                                         |
|----------------------|---------------------------------------------------------|
| 7-CT-R (4/7)         | GGATATCACTAGTAAAAGGTACCGAGCTCCTCAGCAGTTGATGCCACACTTG    |
| 4-NT-F (4/7)         | CGAGAGCTCAGTGTACCTCGCCGCGGCCCATGGAACCAAACACCATGGCCAG    |
| 4-NT-R (4/7)         | GGGAAAGCCGATCTAGATAGGTTTCTCGGTTAATCGGAAACC              |
| 4-Central-F (4/7)    | GGTTCCCTATTGAACGTGAGACCTACCTTGACCGTCTCTCTA              |
| 4-Central-R (4/7)    | CTGGAAGGATACAGTAGGCAAGTAGAGGAATAGAAGTGAAAGGATAAAC       |
| 4-CT-F (4/7)         | CCCCTCACATCTATACCACTTCTTGCCCTATTGTACTATTCCGG            |
| 4-CT-R (4/7)         | GGATATCACTAGTAAAAGGTACCGAGCTCCTTAACAGTCGACGCCACATTGCTTC |
| <b>CesA7 + CesA8</b> |                                                         |
| 7-NT-F (7/8)         | CGAGAGCTCAGTGTACCTCGCCGCGGCCCATGGAAGCTAGCGCCGGTCTTG     |
| 7-NT-R (7/8)         | CAGCAAACCAAATCTCACAGATCACAGAGGTCAGCCATAAT               |
| 7-Central-F (7/8)    | GGTTTATGGCTAACATCTGTGATATGTGAAATCTGGTTCGCTG             |
| 7-Central-R (7/8)    | AATTTGCCGGTAAGAAGGCAGATGGCTGGAAGGATACAGTAG              |
| 7-CT-F (7/8)         | GCTTACTGTACTCTTCCAGCTATTTGTCTCCTTACTGACAAATTCATC        |
| 7-CT-R (7/8)         | GGATATCACTAGTAAAAGGTACCGAGCTCCTCAGCAGTTGATGCCACACTTG    |
| 8-NT-F (7/8)         | CGAGAGCTCAGTGTACCTCGCCGCGGCCCATGATGGAGTCTAGGTCTCCCATC   |
| 8-NT-R (7/8)         | CAGCGAACCAGATTTACATATCACAGATGTTAGCCATAAAC               |
| 8-Central-F (7/8)    | ATTATGGCTGACCTCTGTGATCTGTGAGATTTGGTTTGCTG               |
| 8-Central-R (7/8)    | GATGAATTTGTCAGTAAGGAGACAAATAGCTGGAAGAGTACAGTAAGC        |
| 8-CT-F (7/8)         | CTACTGTATCCTTCCAGCCATCTGCCTTCTTACCGGCAAATT              |
| 8-CT-R (7/8)         | TCACTAGTAAAAGGTACCGAGCTCCTTAGCAATCGATCAAAAGACAGTTC      |

Underlined DNA bases correspond to primer regions that anneal to template DNA, others bases correspond to homology regions for SLiCE cloning

**Table S3** – Pair-wise comparison of domain similarity

|                | N-terminus |       | Central Domain |       | C-Terminus |       |
|----------------|------------|-------|----------------|-------|------------|-------|
|                | I.D.       | Sim.  | I.D.           | Sim.  | I.D.       | Sim.  |
| CESA4 vs CESA7 | 44.2%      | 58.0% | 70.5%          | 80.6% | 76.3%      | 89.3% |
| CESA4 vs CESA8 | 36.9%      | 50.7% | 71.6%          | 82.1% | 76.5%      | 88.5% |
| CESA7 vs CESA8 | 29.8%      | 39.6% | 74.3%          | 85.4% | 74.0%      | 88.2% |

Pair-wise alignment by BLAST to determine sequence identity/similarity

# Supporting Figures and Legends

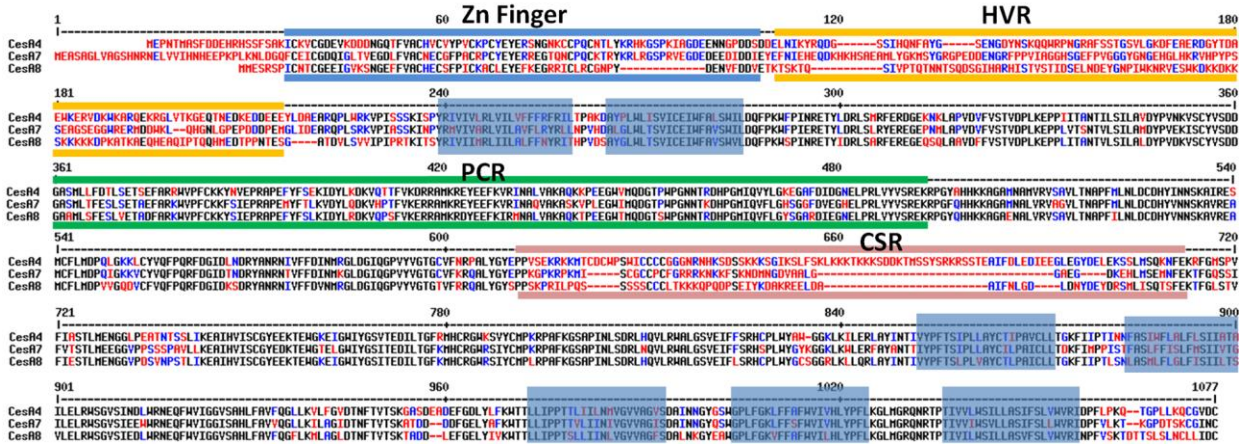

**Figure S1 – Multiple sequence alignment of SCW AtCESAs.**

Residues with low or no sequence conservation are marked in red, while highly conserved residues are black. CESA4, CESA7, and CESA8 share an average sequence identity of 67%, but with poorly conserved areas mainly restricted to the N-terminus and CSR regions.

Labels: Zn-finger, Hyper-Variable Region (HVR), predicted TMHs (TOPCONS prediction, shaded), Plant Conserved Region (PCR), and Class-Specific Region (CSR).

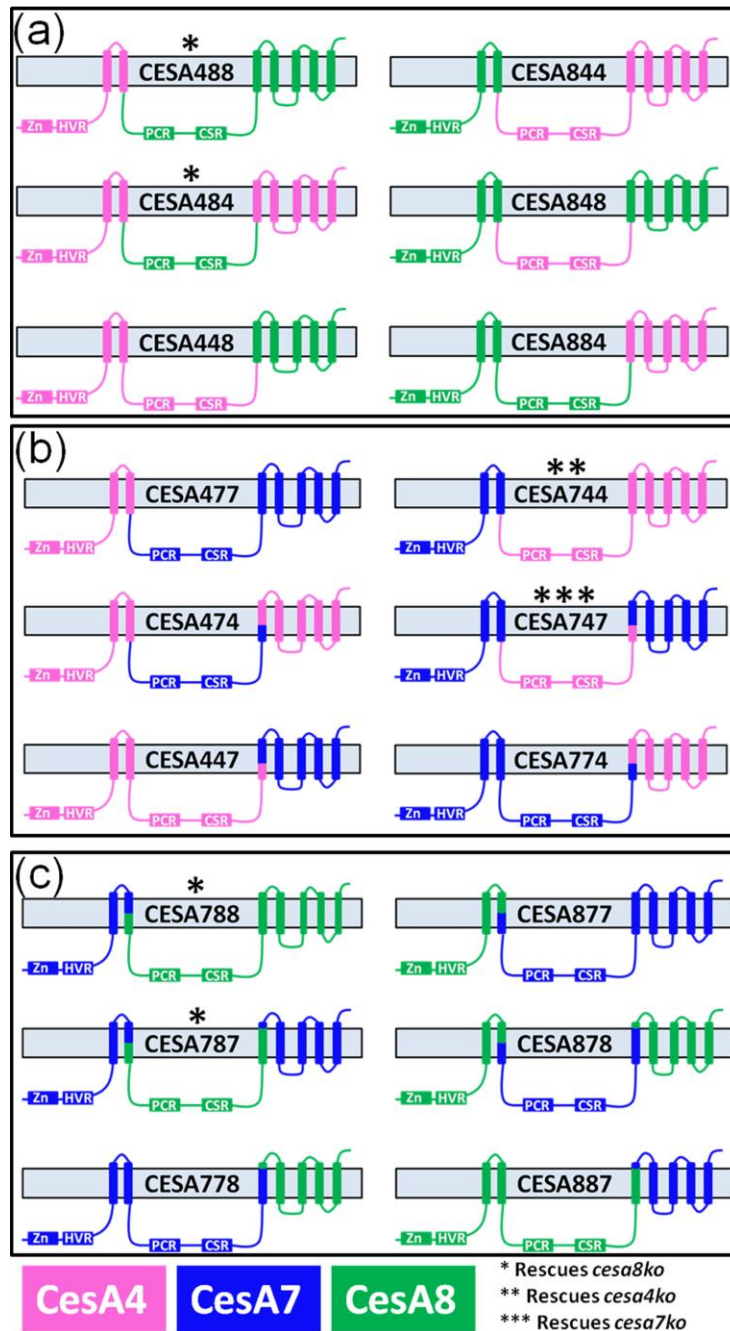

**Figure S2** – CESA domain swap schematics

Schematic representation of all domain swaps that were constructed for this study with regions color coded for origin of sequence: magenta (CESA4), blue (CESA7), or green (CESA8). a) Swaps between CESA4 and CESA8, b) swaps between CESA4 and CESA7, and c) swaps between CESA7 and CESA8. Constructs rescuing *cesa8ko* marked with an asterisk (\*), *cesa4ko* with a double asterisk (\*\*) and *cesa7ko* with a triple asterisk (\*\*\*).

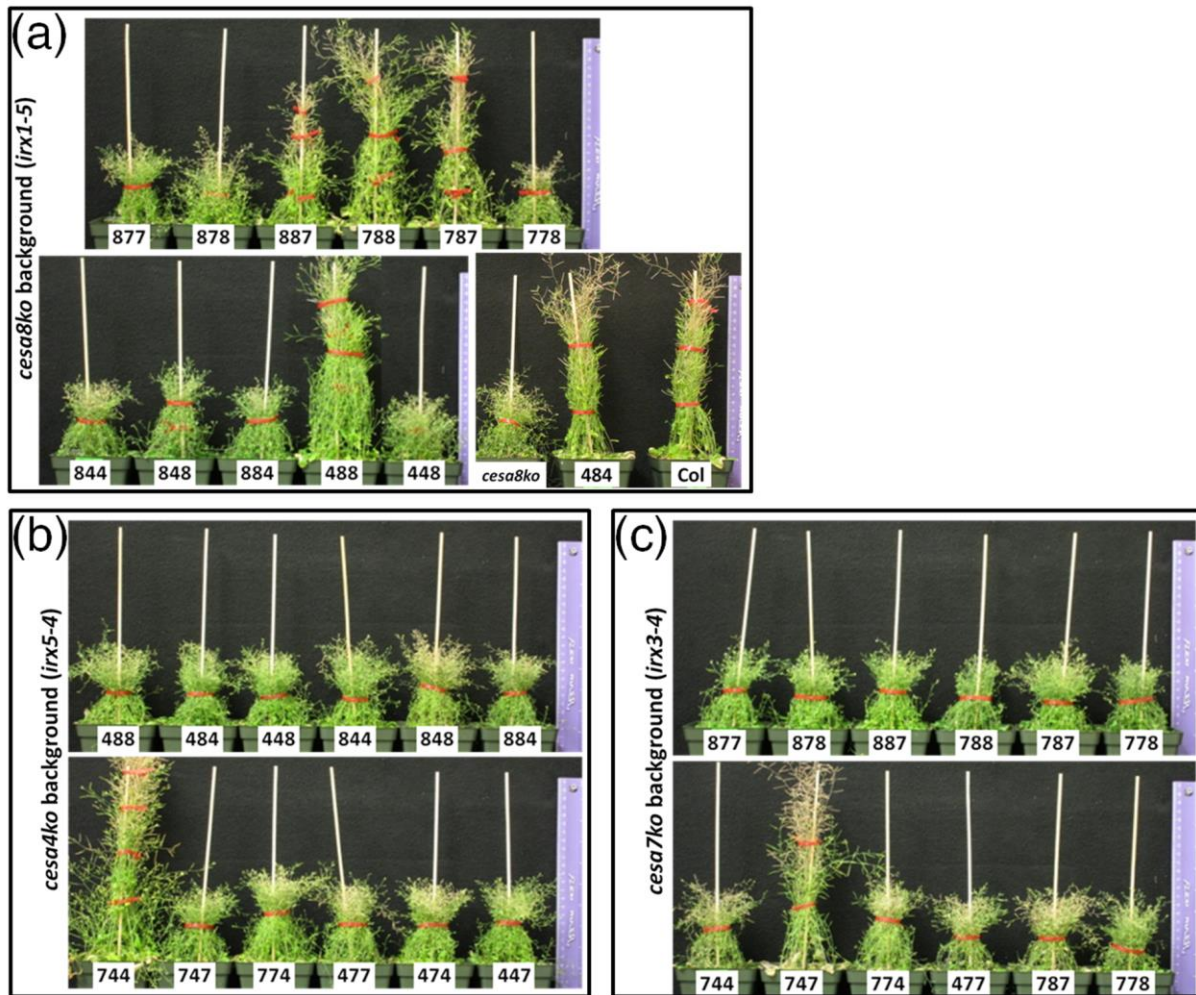

**Figure S3** – Representative image of domain swap Arabidopsis lines

All plants were grown at the same time under the same conditions, with the exception of  $CESA484^{cesa8ko}$ , which was grown at a later date (pictured with wild type, for comparison).

(a) Lines in the *cesa8ko* background, (b) *cesa4ko* background, and (c) *cesa7ko* background.

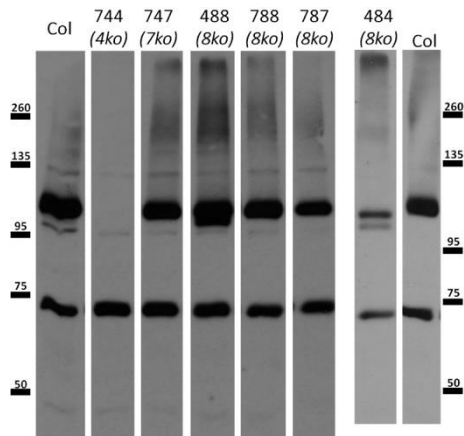

**a. Anti-CesA4.1 (N-terminus)**

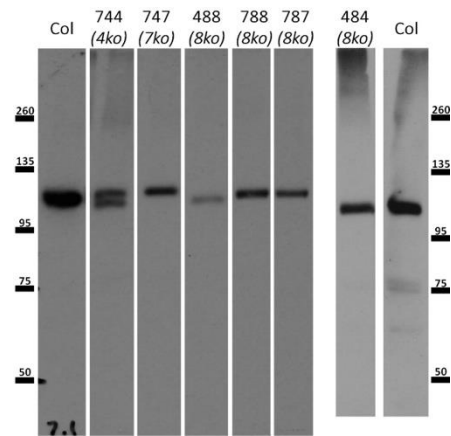

**b. Anti-CesA7.1 (N-terminus)**

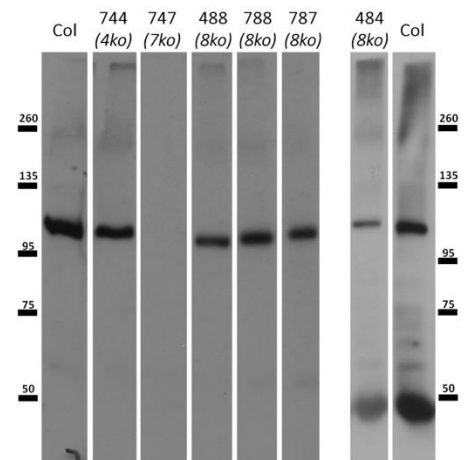

**c. Anti-CesA7.3 (Central Domain)**

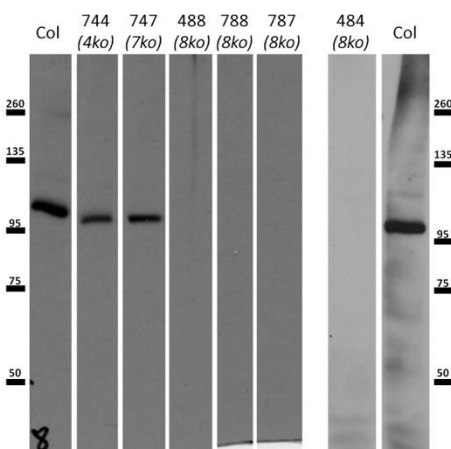

**d. Anti-CesA8.2 (N-terminus)**

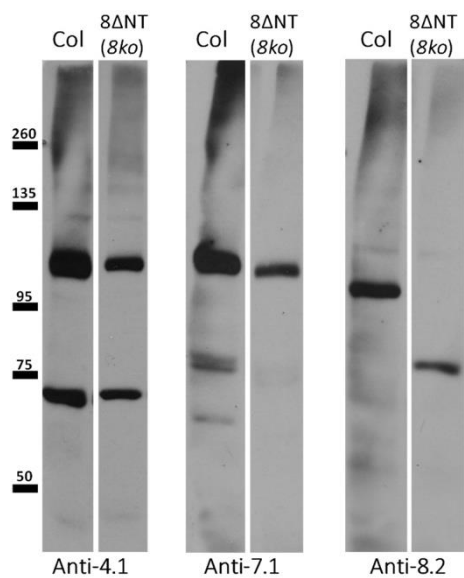

**e. Analysis of CESA8 $\Delta$ NT**

**Figure S4.** Full-length immunoblots allow better assessment of antibody specificity and molecular weights of the recognized CESA proteins. These images were cropped and rearranged for Figures 2, 3, 4, and 5 in the main text. Here, chimera samples are sorted by the probing antibody: a) Anti-CesA4.1; b) Anti-CesA7.1; c) Anti-CesA7.3; and d) Cesa8.2. e) Full length blots for samples analyzing the N-terminal truncated CESA8. Labels match those in Figures 2-5 and can be used to match up lanes. For example, the first two lanes in a, b, c, and d were compiled to generate main text Figure 3c.

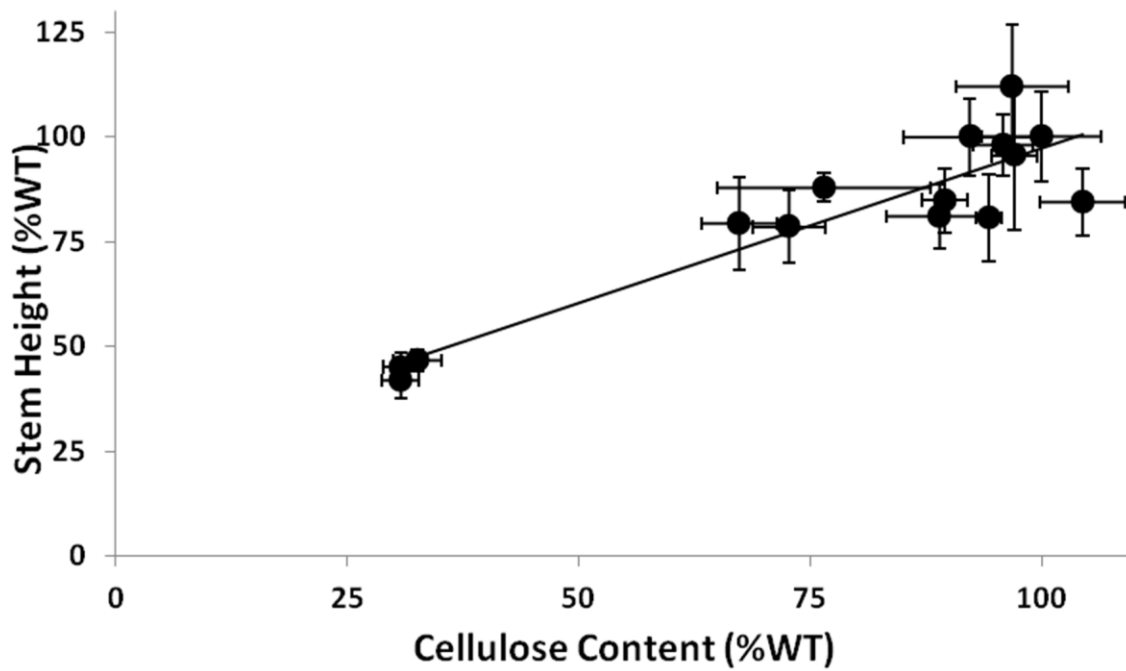

**Figure S5** – Correlation of cellulose content and stem height in rescued lines.

Plot of cellulose content versus stem height of wild type, *cesako* lines, and each transgenic line displaying rescue of these phenotypes. Linear regression fit displays a strong correlation between these two phenotypes, with  $R = 0.92$  and  $R^2 = 0.84$ . Error bars represent standard deviation.

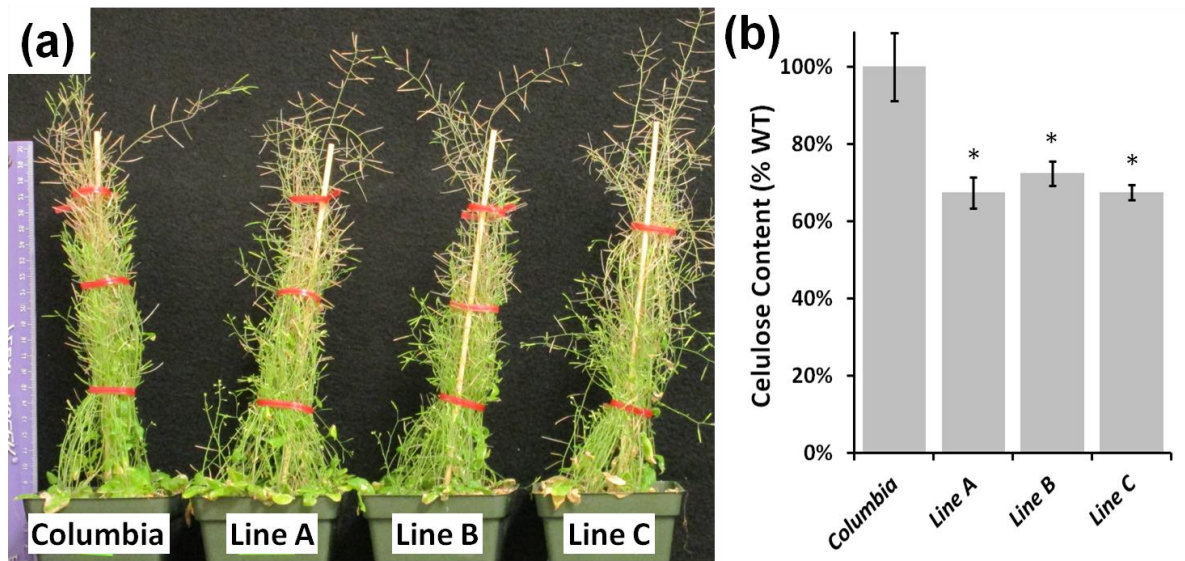

**Figure S6** - *CESA747* consistently rescues the *cesa7ko*

Three independent transgenic lines of *CESA747* in the *cesa7ko* background show consistent rescue of height (a) and cellulose content (b). Error bars represent standard deviation of five measurements. Asterisks indicate partially rescued lines ( $p < 0.01$  as determined by non-parametric Mann-Whitney test in comparison to wild type).
